# Supplementary material for: Tree variability limits the detection of nutrient treatment effects on sap flux density in a northern hardwood forest
Source: PeerJ. 2022 Dec 12;10:e14410. doi: 10.7717/peerj.14410 (PMC9753739; doi:10.7717/peerj.14410)
Supplement: Supplemental Information 1 [file peerj-10-14410-s003.xlsx]

## Sheet: Metadata
Project Title	Daily sapflux densities in hardwood trees and minimum detectable differences calculated from published studies.
Field Crew	Alexandrea Rice (arice01@syr.edu)
Principal Investigator	Ruth Yanai (rdyanai@syr.edu)
	Mariann Johnston (mjohnston@esf.edu)
Collection Period	Summer 2013 to 2017
Project Location	Bartlett Experimental Forest, NH and Hubbard Brook Experimental Forest, NH
Project Description	Measuring sap flow is a technique to estimate transpiration. There have been some inconsistencies in the data collected in the MELNHE plots so the goal of this project was to investigate these inconstistenies as well as compare sap flow between the treatements simultaneously.
Field Methods	Sap flow was measured using the Granier method which used a reference and a heated probe to measure the rate of sap flow through the temperature difference between the probes. The sensors were inserted into 3/63 cm diameter holes that were drilled into the tree after the bark had been removed. These holes were 21 mm deep. These probes were connected to a data logger that was powered by three 12V …
Data Processing	Baseliner software used the temperature difference recorded to converted to sap flux (Js, g x m2 x s-1). The data for RH, PAR, and Temp were retrieved from: http://data.neonscience.org/browse-data?siteCode=BART. Data files from the data loggers were prepared for analyisis using a protocol from Michele Pruyn. A helpful paper to read on how to use baseliner/ look at the data in baseliner is Oishi, …
Related Datasets	Lily Zahor thesis, Adan Hernandez thesis and sap flow data, Sophie Harrison sap flow data, Alexandrea Rice Thesis, Arianna Libenson sap flow data
Publications	N/A
Sheets included in this file	N x P: nitrogen and phosphorus factorial design sap flow measurements. Each line is a tree in each plot. Measurements are daily sap flux densitiy averages. Ca: Sap flux densitiy measurements from trees in calcium addition plots. Each line is a tree in a plot. Measurements are daily sap flux density averages. MDD: Files with "(MDD)" contain values from published papers that then a minimum detectab…
Known Problems	The data set is not complete for every day because it took a few weeks of troubleshooting to get all the probes working simultaneously. The last few weeks of the data besides a day or two have all the probes working at the same time.
Comments	Baseliner conversion is user dependent. This could cause difficulty and inconstancy when comparing datasets by different people. Raw data from the Bartett Flux Tower was in 30 minute interevals so I interpolated the values for every 15 minutes. For datsets with minute points I averaged for every 15 minutes.

## Sheet: NxP
Year	SapTime	Site	TreatYear	Yrstand	Treat	NTRT	PTRT	Species	DBH	TagNo	TreeID	Avg		Plot Average	Plot SD	CV (%)		CV across treatments (%)
2013	217	C8	1	Bartlett Mature_2013	Con	NO	NO	American beech		NA1	American beech2	246.004
2013	217	C8	1	Bartlett Mature_2013	Con	NO	NO	American beech		NA3	American beech3	842.326
2013	217	C8	1	Bartlett Mature_2013	Con	NO	NO	sugar maple		NA7	sugar maple1	264.233
2013	217	C8	1	Bartlett Mature_2013	Con	NO	NO	sugar maple		NA11	sugar maple2	174.711
2013	217	C8	1	Bartlett Mature_2013	Con	NO	NO	sugar maple		NA15	sugar maple3	3164.75
2013	217	HBO	1	Hubbard Brook Mature_2013	Con	NO	NO	American beech			American beecherican beech1	1022.94
2013	217	HBO	1	Hubbard Brook Mature_2013	Con	NO	NO	American beech			American beech3	1286.51
2013	217	HBO	1	Hubbard Brook Mature_2013	Con	NO	NO	sugar maple			sugar maple1	571.621
2013	217	HBO	1	Hubbard Brook Mature_2013	Con	NO	NO	sugar maple			sugar maple2	640.92
2013	217	HBO	1	Hubbard Brook Mature_2013	Con	NO	NO	yellow birch			yellow birch1	821.011
2013	217	HBO	1	Hubbard Brook Mature_2013	Con	NO	NO	yellow birch			yellow birch3	458.937
2013	217	HBO	1	Hubbard Brook Mature_2013	Con	NO	NO	yellow birch			yellow birch3	744.919
2013	200	JBO	1	Jeffers Brook Mature_2013	Con	NO	NO	sugar maple			sugar maple1	467.455
2013	200	JBO	1	Jeffers Brook Mature_2013	Con	NO	NO	sugar maple			sugar maple2	338.844
2013	200	JBO	1	Jeffers Brook Mature_2013	Con	NO	NO	sugar maple			sugar maple3	611.65
2013	200	JBO	1	Jeffers Brook Mature_2013	Con	NO	NO	sugar maple			sugar maple4	486.198						12.2383
2013	200	JBO	1	Jeffers Brook Mature_2013	Con	NO	NO	yellow birch			yellow birch1	326.219
2013	200	JBO	1	Jeffers Brook Mature_2013	Con	NO	NO	yellow birch			yellow birch2	640.339
2013	200	JBO	1	Jeffers Brook Mature_2013	Con	NO	NO	yellow birch			yellow birch3	825.126
2014	174	C8	2	Bartlett Mature_2014	Con	NO	NO	American beech			American beech4	731.622
2014	174	C8	2	Bartlett Mature_2014	Con	NO	NO	American beech			American beech5	524.873
2014	174	C8	2	Bartlett Mature_2014	Con	NO	NO	American beech			American beech6	673.804
2014	174	C8	2	Bartlett Mature_2014	Con	NO	NO	sugar maple			sugar maple4	676.957
2014	174	C8	2	Bartlett Mature_2014	Con	NO	NO	sugar maple			sugar maple5	298.587
2014	174	C8	2	Bartlett Mature_2014	Con	NO	NO	sugar maple			sugar maple6	306.321
2014	182	HBO	2	Hubbard Brook Mature_2014	Con	NO	NO	American beech			American beech1	622.521
2014	182	HBO	2	Hubbard Brook Mature_2014	Con	NO	NO	American beech			American beech2	685.055
2014	182	HBO	2	Hubbard Brook Mature_2014	Con	NO	NO	American beech			American beech3	1046.18
2014	182	HBO	2	Hubbard Brook Mature_2014	Con	NO	NO	sugar maple			sugar maple1	666.488
2014	182	HBO	2	Hubbard Brook Mature_2014	Con	NO	NO	sugar maple			sugar maple2	391.642
2014	182	HBO	2	Hubbard Brook Mature_2014	Con	NO	NO	sugar maple			sugar maple3	478.935
2014	182	HBO	2	Hubbard Brook Mature_2014	Con	NO	NO	yellow birch			yellow birch1	320.586
2014	182	HBO	2	Hubbard Brook Mature_2014	Con	NO	NO	yellow birch			yellow birch2	1083.85
2014	182	HBO	2	Hubbard Brook Mature_2014	Con	NO	NO	yellow birch			yellow birch3	608.965
2014	213	JBO	2	Jeffers Brook Mature_2014	Con	NO	NO	sugar maple			sugar maple7	673.407
2014	213	JBO	2	Jeffers Brook Mature_2014	Con	NO	NO	sugar maple			sugar maple8	570.648
2014	213	JBO	2	Jeffers Brook Mature_2014	Con	NO	NO	sugar maple			sugar maple9	543.734
2014	213	JBO	2	Jeffers Brook Mature_2014	Con	NO	NO	sugar maple			sugar maple10	571.069
2014	213	JBO	2	Jeffers Brook Mature_2014	Con	NO	NO	yellow birch			yellow birch6	622.837
2014	213	JBO	2	Jeffers Brook Mature_2014	Con	NO	NO	yellow birch			yellow birch7	408.528
2014	213	JBO	2	Jeffers Brook Mature_2014	Con	NO	NO	yellow birch			yellow birch8	491.233
2015	213	C6	3	Bartlett Successional_2015	Con	NO	NO	white birch	14.6	678	white birch1	1043.78		987.609	133.42	13.5094		13.3645
2015	213	C6	3	Bartlett Successional_2015	Con	NO	NO	white birch	31	8849	white birch2	1026.81
2015	213	C6	3	Bartlett Successional_2015	Con	NO	NO	white birch	26.5	1445	white birch3	1136.55
2015	213	C6	3	Bartlett Successional_2015	Con	NO	NO	white birch	27.4	1424	white birch5	783.528
2015	203	C6	3	Bartlett Successional_2015	Con	NO	NO	white birch	14.6	678	white birch1	941.543
2015	203	C6	3	Bartlett Successional_2015	Con	NO	NO	white birch	31	8849	white birch2	867.056
2015	203	C6	3	Bartlett Successional_2015	Con	NO	NO	white birch	26.5	1445	white birch3	1176.18
2015	203	C6	3	Bartlett Successional_2015	Con	NO	NO	white birch	27.4	1424	white birch5	925.42
2015	213	C6	3	Bartlett Successional_2015	N	YES	NO	white birch	24.5	1436	white birch1	1260.97		990.618	469.935	47.4386
2015	213	C6	3	Bartlett Successional_2015	N	YES	NO	white birch	17.9	1273	white birch3	450.586
2015	213	C6	3	Bartlett Successional_2015	N	YES	NO	white birch	24.3	1070	white birch8	763.914
2015	213	C6	3	Bartlett Successional_2015	N	YES	NO	white birch	20	1434	white birch10	1487
2015	213	C6	3	Bartlett Successional_2015	NP	YES	YES	white birch	19.9	358	white birch2	1021.46		887.545	124.22	13.9959
2015	213	C6	3	Bartlett Successional_2015	NP	YES	YES	white birch	17.8	351	white birch3	833.715
2015	213	C6	3	Bartlett Successional_2015	NP	YES	YES	white birch	14.9	352	white birch4	952.992
2015	213	C6	3	Bartlett Successional_2015	NP	YES	YES	white birch	19.4	356	white birch5	742.016
2015	213	C6	3	Bartlett Successional_2015	P	NO	YES	white birch	19	1083	white birch1	534.611		734.566	219.485	29.8796
2015	213	C6	3	Bartlett Successional_2015	P	NO	YES	white birch	23.1	1085	white birch2	1069.63
2015	213	C6	3	Bartlett Successional_2015	P	NO	YES	white birch	24.5	1221	white birch3	808.86
2015	213	C6	3	Bartlett Successional_2015	P	NO	YES	white birch	21.5	483	white birch9	549.229
2015	213	C6	3	Bartlett Successional_2015	P	NO	YES	white birch		NA	white birch10	710.504
2017	212	C8	5	Bartlett Mature_2017	Con	NO	NO	sugar maple	43.2	264		1642.32		1121.51	352.441	31.4255		7.64523
2017	212	C8	5	Bartlett Mature_2017	Con	NO	NO	sugar maple	21.1	273		1272.42
2017	212	C8	5	Bartlett Mature_2017	Con	NO	NO	sugar maple	54.2	272		806.115
2017	212	C8	5	Bartlett Mature_2017	Con	NO	NO	sugar maple	36.6	270		802.137
2017	212	C8	5	Bartlett Mature_2017	Con	NO	NO	sugar maple	32.2	265		1084.57
2017	212	C8	5	Bartlett Mature_2017	N	YES	NO	sugar maple	38.5	37		1384.74		1252.84	363.735	29.0329
2017	212	C8	5	Bartlett Mature_2017	N	YES	NO	sugar maple	42.9	33		1225.67
2017	212	C8	5	Bartlett Mature_2017	N	YES	NO	sugar maple	28.5	1449		623.21
2017	212	C8	5	Bartlett Mature_2017	N	YES	NO	sugar maple	38	1451		1435.53
2017	212	C8	5	Bartlett Mature_2017	N	YES	NO	sugar maple	35.9	1466		1145.54
2017	212	C8	5	Bartlett Mature_2017	N	YES	NO	sugar maple	40.3	35		1702.35
2017	212	C8	5	Bartlett Mature_2017	NP	YES	YES	sugar maple	27.1	199		2435.17		1233.77	830.926	67.3485
2017	212	C8	5	Bartlett Mature_2017	NP	YES	YES	sugar maple	20	927		1670.56
2017	212	C8	5	Bartlett Mature_2017	NP	YES	YES	sugar maple	53.5	928		859.056
2017	212	C8	5	Bartlett Mature_2017	NP	YES	YES	sugar maple	54	Big Papa		294.616
2017	212	C8	5	Bartlett Mature_2017	NP	YES	YES	sugar maple	37.3	Und 2		909.452
2017	212	C8	5	Bartlett Mature_2017	P	NO	YES	sugar maple	46.5	205		828.622		1040.45	219.482	21.0949
2017	212	C8	5	Bartlett Mature_2017	P	NO	YES	sugar maple	48	211		872.875
2017	212	C8	5	Bartlett Mature_2017	P	NO	YES	sugar maple	44.5	239		1404.73
2017	212	C8	5	Bartlett Mature_2017	P	NO	YES	sugar maple	24	240		1046.18
2017	212	C8	5	Bartlett Mature_2017	P	NO	YES	sugar maple	32.2	242		912.612
2017	212	C8	5	Bartlett Mature_2017	P	NO	YES	sugar maple	37.1	243		1177.7
2017		C8		Bartlett Mature	Ca									1121.51	352.441	31.4255
2018		HBM	6	Hubbard Brook Successional_2018	Con	NO	NO	red maple	21.8	8511		856.208		1453.85	442.131	30.411		15.7053
2018		HBM	6	Hubbard Brook Successional_2018	Con	NO	NO	red maple	21	8512		1435.72
2018		HBM	6	Hubbard Brook Successional_2018	Con	NO	NO	red maple	21.3	8519		1197.07
2018		HBM	6	Hubbard Brook Successional_2018	Con	NO	NO	sugar maple	15.9	8516		1538.32
2018		HBM	6	Hubbard Brook Successional_2018	Con	NO	NO	sugar maple	20.3	8525		2258.03
2018		HBM	6	Hubbard Brook Successional_2018	Con	NO	NO	sugar maple	15.7	8515		1520.86
2018		HBM	6	Hubbard Brook Successional_2018	Con	NO	NO	white birch	27.8	8501		1048.48
2018		HBM	6	Hubbard Brook Successional_2018	Con	NO	NO	white birch	24.5	8513		1979.56
2018		HBM	6	Hubbard Brook Successional_2018	Con	NO	NO	white birch	26	8500		1250.43
2018		HBM	6	Hubbard Brook Successional_2018	N	YES	NO	red maple	21.8	8581		2150.66		1821.43	654.57	35.9372
2018		HBM	6	Hubbard Brook Successional_2018	N	YES	NO	red maple	28.2	8559		2358.73
2018		HBM	6	Hubbard Brook Successional_2018	N	YES	NO	red maple	27.2	8565		1810.64
2018		HBM	6	Hubbard Brook Successional_2018	N	YES	NO	sugar maple	16.5	8540		2029.48
2018		HBM	6	Hubbard Brook Successional_2018	N	YES	NO	sugar maple	17.3	8537		1206.15
2018		HBM	6	Hubbard Brook Successional_2018	N	YES	NO	sugar maple	18.6	8573		728.264
2018		HBM	6	Hubbard Brook Successional_2018	N	YES	NO	white birch	34.2	8546		1729.79
2018		HBM	6	Hubbard Brook Successional_2018	N	YES	NO	white birch	23.4	1080		1436.52
2018		HBM	6	Hubbard Brook Successional_2018	N	YES	NO	white birch	27	1069		2942.63
2018		HBM	6	Hubbard Brook Successional_2018	NP	YES	YES	red maple	19.6	1081		585.891		1485.9	547.126	36.8211
2018		HBM	6	Hubbard Brook Successional_2018	NP	YES	YES	red maple	27.5	8596		1603.81
2018		HBM	6	Hubbard Brook Successional_2018	NP	YES	YES	red maple	21.7	1446		1472.3
2018		HBM	6	Hubbard Brook Successional_2018	NP	YES	YES	sugar maple	17.8	2189		1340.32
2018		HBM	6	Hubbard Brook Successional_2018	NP	YES	YES	sugar maple	20.7	8609		1823.72
2018		HBM	6	Hubbard Brook Successional_2018	NP	YES	YES	sugar maple	21.2	1402		1849.17
2018		HBM	6	Hubbard Brook Successional_2018	NP	YES	YES	white birch	21.8	8585		2375.38
2018		HBM	6	Hubbard Brook Successional_2018	NP	YES	YES	white birch	30.8	8597		1549.49
2018		HBM	6	Hubbard Brook Successional_2018	NP	YES	YES	white birch	35.8	8584		773.036
2018		HBM	6	Hubbard Brook Successional_2018	P	NO	YES	red maple	22.9	38		1066.79		2001.11	945.277	47.2376
2018		HBM	6	Hubbard Brook Successional_2018	P	NO	YES	red maple	32.4	29		2764.76
2018		HBM	6	Hubbard Brook Successional_2018	P	NO	YES	red maple	37.5	1444		1295.6
2018		HBM	6	Hubbard Brook Successional_2018	P	NO	YES	sugar maple	20.5	23		1980.68
2018		HBM	6	Hubbard Brook Successional_2018	P	NO	YES	sugar maple	16.5	65		1751.59
2018		HBM	6	Hubbard Brook Successional_2018	P	NO	YES	sugar maple	23.2	31		1800.95
2018		HBM	6	Hubbard Brook Successional_2018	P	NO	YES	white birch	23.6	924		2315.82
2018		HBM	6	Hubbard Brook Successional_2018	P	NO	YES	white birch	32.5	57		1023.5
2018		HBM	6	Hubbard Brook Successional_2018	P	NO	YES	white birch	39.7	17		4010.35
2018				Hubbard Brook Successional_2019	Ca									1453.85	442.131	30.411

## Sheet: Ca
Year	SapTime	Stand	TreatYear	Treat	Dumm	NTRT	PTRT	Species	Avg		Plot Average	Plot SD	CV (%)		CV across treatments (%)
2013	217	C8	2	Ca	1	NO	NO	AB	834.664		642.815	374.605	58.2757		26.437
2013	217	C8	2	Ca	1	NO	NO	AB	583.199
2013	217	C8	2	Ca	1	NO	NO	AB	427.118
2013	217	C8	2	Ca	1	NO	NO	SM	154.167
2013	217	C8	2	Ca	1	NO	NO	SM	402.163
2013	217	C8	2	Ca	1	NO	NO	SM	509.211
2013	217	C8	2	Ca	1	NO	NO	YB	1484.36
2013	217	C8	2	Ca	1	NO	NO	YB	756.531
2013	217	C8	2	Ca	1	NO	NO	YB	633.923
2013	217	C8	2	Con	1	NO	NO	AB	246.004		938.405	1273.09	135.665
2013	217	C8	2	Con	1	NO	NO	AB	842.326
2013	217	C8	2	Con	1	NO	NO	SM	264.233
2013	217	C8	2	Con	1	NO	NO	SM	174.711
2013	217	C8	2	Con	1	NO	NO	SM	3164.75
2013	217	HBO	2	Ca	1	NO	NO	AB	473.276		621.422	200.005	32.185		17.1033
2013	217	HBO	2	Ca	1	NO	NO	AB	913.409
2013	217	HBO	2	Ca	1	NO	NO	SM	398.857
2013	217	HBO	2	Ca	1	NO	NO	SM	670
2013	217	HBO	2	Ca	1	NO	NO	YB	651.57
2013	217	HBO	2	Con	1	NO	NO	AB	1022.94		792.409	283.801	35.815
2013	217	HBO	2	Con	1	NO	NO	AB	1286.51
2013	217	HBO	2	Con	1	NO	NO	SM	571.621
2013	217	HBO	2	Con	1	NO	NO	SM	640.92
2013	217	HBO	2	Con	1	NO	NO	YB	821.011
2013	217	HBO	2	Con	1	NO	NO	YB	458.937
2013	217	HBO	2	Con	1	NO	NO	YB	744.919
2013	187	JBO	2	Ca	1	NO	NO	SM	1304.43		1094.87	352.608	32.2055		49.4015
2013	187	JBO	2	Ca	1	NO	NO	SM	687.773
2013	187	JBO	2	Ca	1	NO	NO	YB	1292.41
2013	201	JBO	2	Con	1	NO	NO	SM	467.455		527.976	177.862	33.6876
2013	201	JBO	2	Con	1	NO	NO	SM	338.844
2013	201	JBO	2	Con	1	NO	NO	SM	611.65
2013	201	JBO	2	Con	1	NO	NO	SM	486.198
2013	201	JBO	2	Con	1	NO	NO	YB	326.219
2013	201	JBO	2	Con	1	NO	NO	YB	640.339
2013	201	JBO	2	Con	1	NO	NO	YB	825.126
2014	174	C8	3	Ca	1	NO	NO	SM	331.971		608.636	207.606	34.11		9.05825
2014	174	C8	3	Ca	1	NO	NO	SM	721.397
2014	174	C8	3	Ca	1	NO	NO	YB	575.24
2014	174	C8	3	Ca	1	NO	NO	YB	805.934
2014	174	C8	3	Con	1	NO	NO	AB	731.622		535.361	193.063	36.0621
2014	174	C8	3	Con	1	NO	NO	AB	524.873
2014	174	C8	3	Con	1	NO	NO	AB	673.804
2014	174	C8	3	Con	1	NO	NO	SM	676.957
2014	174	C8	3	Con	1	NO	NO	SM	298.587
2014	174	C8	3	Con	1	NO	NO	SM	306.321
2014	182	HBO	3	Ca	1	NO	NO	AB	713.595		742.231	330.773	44.5647		8.71908
2014	182	HBO	3	Ca	1	NO	NO	AB	961.116
2014	182	HBO	3	Ca	1	NO	NO	SM	1180
2014	182	HBO	3	Ca	1	NO	NO	SM	422.142
2014	182	HBO	3	Ca	1	NO	NO	YB	434.308
2014	182	HBO	3	Con	1	NO	NO	AB	622.521		656.024	262.993	40.0888
2014	182	HBO	3	Con	1	NO	NO	AB	685.055
2014	182	HBO	3	Con	1	NO	NO	AB	1046.18
2014	182	HBO	3	Con	1	NO	NO	SM	666.488
2014	182	HBO	3	Con	1	NO	NO	SM	391.642
2014	182	HBO	3	Con	1	NO	NO	SM	478.935
2014	182	HBO	3	Con	1	NO	NO	YB	320.586
2014	182	HBO	3	Con	1	NO	NO	YB	1083.85
2014	182	HBO	3	Con	1	NO	NO	YB	608.965
2014	213	JBO	3	Ca	1	NO	NO	SM	1152.83		694.961	244.514	35.1838		15.899
2014	213	JBO	3	Ca	1	NO	NO	SM	466.611
2014	213	JBO	3	Ca	1	NO	NO	SM	959.609
2014	213	JBO	3	Ca	1	NO	NO	SM	672.777
2014	213	JBO	3	Ca	1	NO	NO	YB	517.592
2014	213	JBO	3	Ca	1	NO	NO	YB	728.604
2014	213	JBO	3	Ca	1	NO	NO	YB	691.59
2014	213	JBO	3	Ca	1	NO	NO	YB	358.445
2014	213	JBO	3	Ca	1	NO	NO	YB	706.595
2014	213	JBO	3	Con	1	NO	NO	SM	673.407		554.494	86.3813	15.5784
2014	213	JBO	3	Con	1	NO	NO	SM	570.648
2014	213	JBO	3	Con	1	NO	NO	SM	543.734
2014	213	JBO	3	Con	1	NO	NO	SM	571.069
2014	213	JBO	3	Con	1	NO	NO	YB	622.837
2014	213	JBO	3	Con	1	NO	NO	YB	408.528
2014	213	JBO	3	Con	1	NO	NO	YB	491.233
2015	203	C6	4	Ca	2	NO	NO	WB	906.134		839.397	75.8143	9.032		11.4725
2015	203	C6	4	Ca	2	NO	NO	WB	794.982
2015	203	C6	4	Ca	2	NO	NO	WB	900.926
2015	203	C6	4	Ca	2	NO	NO	WB	755.545
2015	213	C6	4	Con	2	NO	NO	WB	1043.78		987.609	133.42	13.5094
2015	213	C6	4	Con	2	NO	NO	WB	1026.81
2015	213	C6	4	Con	2	NO	NO	WB	1136.55
2015	213	C6	4	Con	2	NO	NO	WB	783.528
2015	203	C6	4	Con	2	NO	NO	WB	941.543
2015	203	C6	4	Con	2	NO	NO	WB	867.056
2015	203	C6	4	Con	2	NO	NO	WB	1176.18
2015	203	C6	4	Con	2	NO	NO	WB	925.42
2017	212	C8	6	Ca	2	NO	NO	SM	1732.87		1086.76	481.803	44.3339
2017	212	C8	6	Ca	2	NO	NO	SM	856.471
2017	212	C8	6	Ca	2	NO	NO	SM	1142.91
2017	212	C8	6	Ca	2	NO	NO	SM	614.788
2017	212	C8	6	Con	2	NO	NO	SM	1642.32		1121.51	352.441	31.4255
2017	212	C8	6	Con	2	NO	NO	SM	1272.42
2017	212	C8	6	Con	2	NO	NO	SM	806.115
2017	212	C8	6	Con	2	NO	NO	SM	802.137
2017	212	C8	6	Con	2	NO	NO	SM	1084.57
2018		HBM	7	Ca	2	NO	NO	RM	2111.91		1976.28	620.427	31.3938
2018		HBM	7	Ca	2	NO	NO	RM	2980.05
2018		HBM	7	Ca	2	NO	NO	RM	1691.21
2018		HBM	7	Ca	2	NO	NO	SM	1537.49
2018		HBM	7	Ca	2	NO	NO	SM	2330.92
2018		HBM	7	Ca	2	NO	NO	SM	2098.33
2018		HBM	3	Ca	2	NO	NO	WB	724.18
2018		HBM	3	Ca	2	NO	NO	WB	2213.33
2018		HBM	3	Ca	2	NO	NO	WB	2099.07
2018		HBM	7	Con	2	NO	NO	RM	856.208		1453.85	442.131	30.411
2018		HBM	7	Con	2	NO	NO	RM	1435.72
2018		HBM	7	Con	2	NO	NO	RM	1197.07
2018		HBM	7	Con	2	NO	NO	SM	1538.32
2018		HBM	7	Con	2	NO	NO	SM	2258.03
2018		HBM	7	Con	2	NO	NO	SM	1520.86
2018		HBM	3	Con	2	NO	NO	WB	1048.48
2018		HBM	3	Con	2	NO	NO	WB	1979.56
2018		HBM	3	Con	2	NO	NO	WB	1250.43

## Sheet: N X P R code
## Now NxP mixed Model
SF.n.p<- read_excel("~/College Years!/SUNY ESF/MELNHE/Sap Flow/NxP File.xlsx")
SF.18<-SF.n.p[SF.n.p$Year=="2018",]
SF.n.p$TreatYear<-as.factor(SF.n.p$TreatYear)
SF.n.p$NTRT<-as.factor(SF.n.p$NTRT)
SF.n.p$PTRT<-as.factor(SF.n.p$PTRT)
SF.n.p$Site<- as.factor((SF.n.p$Site))
names(SF.n.p)
SF.n.p$Avg<- log(SF.n.p$Avg)
SFnp<-lm(Avg~NTRT*PTRT+Species+TreatYear, data = SF.n.p)
summary(SFnp)
qqnorm(resid(SFnp))
qqline(resid(SFnp))
shapiro.test(resid(SFnp))
skewness(resid(SFnp))
Anova(SFnp, type = 3)

## Sheet: Ca R Code
library(readxl)
library(lme4)
library(car)
library(moments)
library(emmeans)
library(nlme)
#mixed effects model for Ca study with residual test
SF.Ca$TreatYear<-as.factor(SF.Ca$TreatYear)
SF.Ca$Dumm<- as.factor(SF.Ca$Dumm)
SF.Ca$Species<-as.factor((SF.Ca$Species))
SF.Ca$Avg<- log10(SF.Ca$Avg)
SF.Ca$Stand<-as.factor(SF.Ca$Stand)##SF.18<-SF.Ca[SF.Ca$Year=="2018",]
SF.cacon<-lmer(Avg~Dumm*Treat+Species+(1|Dumm/TreatYear/Stand/Treat),data = SF.Ca )
summary(SF.cacon)
qqnorm(resid(SF.cacon))
qqline(resid(SF.cacon))
shapiro.test(resid(SF.cacon))
skewness(resid(SF.cacon))
# Anova and Tukey HSD
Anova(SF.cacon, "F", type=3,contrasts = list(Dumm=contr.sum, Treat=contr.sum))
FOR GRAPH

## Sheet: Jung et al. 2011 (MDD)
Species	SF Mean	SF SE	SD	CV			Average	SD	variance			MDD	Estimated n			MDD	Estimated n
Q. mongolica	21.9	3.4	7.60263	0.347152		Q. mongolica	17.66	8.09525	65.533		k	5	5		k	5	5
Q. mongolica	15.9	3.9	8.72067	0.54847		T. amurensis	25.06	2.60864	6.805		n	5	39		n	3	39
Q. mongolica	21.8	3.9	8.72067	0.400031		U. davidiana	22.14	5.23908	27.448		s2	23.9585	23.9585		s2	23.9585	1.87
Q. mongolica	4.3	2.3	5.14296	1.19604		C controversa	27.7	0.971253	0.943333		v1	4	4		v1	4	4
Q. mongolica	24.4	4	8.94427	0.366569		A. mona	26.1	4.36616	19.0633		v2	20	190		v2	10	190
T. amurensis	38.9	9.3	20.7954	0.534587					23.9585		phi	1.72	1.87		phi	1.95	1.87
T. amurensis	7.7	2.8	6.26099	0.813116							MDD	11.9062	4.63489		MDD	17.4263	1.29488
T. amurensis	38.7	8.9	19.901	0.514238							mean	23.1286	23.1286		mean	23.1286	#DIV/0!
T. amurensis	21.4	7.8	17.4413	0.815015							MDD%	51.4784	20.0397		MDD%	75.3451	#DIV/0!
T. amurensis	18.6	7.7	17.2177	0.925684
U. davidiana	22.9	5.4	12.0748	0.527282
U. davidiana	14.3	2.4	5.36656	0.375284
U. davidiana	23.3	3.9	8.72067	0.374277
U. davidiana	21.3	4.9	10.9567	0.514401
U. davidiana	28.9	4.1	9.16788	0.317228
C controversa	34	7.6	13.1636	0.387164
C controversa	33.4	7	12.1244	0.363005
C controversa	15.7	5.7	9.87269	0.628834
A. mona	15.7	5.7	9.87269	0.628834
A. mona	30.7	12.4	21.4774	0.699591
A. mona	31.9	13.9	24.0755	0.754718

## Sheet: Ewers 2002 (MDD)
Species	n	Mean SF (g/cm2/day)	SE SF	SD	Variance			MDD	Estimated n
red pine	8	34.8	0.9	2.54558	6.48		k	8	8
sugar maple	8	17.5	1.5	4.24264	18		n	8	5
basswood	8	67.2	1.1	3.11127	9.68		s2	12.75	12.75
aspen	8	51.2	0.9	2.54558	6.48		v1	7	7
balsam fir	8	38.1	1	2.82843	8		v2	56	32
white cedar	8	57.7	1.9	5.37401	28.88		phi	1.43	1.41
speckled alder	8	62.5	1.5	4.24264	18		MDD	7.22115	9.00636
balsam fir	8	34.7	0.9	2.54558	6.48		mean	45.4625	45.4625
	64				12.75		MDD%	15.8837	19.8105
Paper: https://www.researchgate.net/publication/229269301_Species_effects_on_stand_transpiration_in_northern_Wisconsin

## Sheet: da Silva et al 2008 (MDD)
Treat	n	SF (mmol H2O/ m2/s)	SF SD	Variance			MDD @0.05	Estimated n			MDD @ 0.01
control	9	3.47	1.5	2.25		k	2	2		k	2
p	9	4.04	1.15	1.3225		n	9	90		n	9
				1.78625		s2	1.78625	1.78625		s2	1.78625
						v1	1	1		v1	1
						v2	16	178		v2	16
						phi	2.2	2.65		phi	2.7
						MDD	1.96021	0.746665		MDD	2.40571
						mean	3.755	3.755		mean	3.755
						MDD%	52.2027	19.8846		MDD%	64.0669

## Sheet: Loranty 2008 (MDD)
Species	Study n	Mean SF g/cm2/day)	SE SF	SD	Variance				MDD	Estimated n			MDD	Estimated n
Alder	41	117	8.8	56.3475	3175.04			k	3	3		k	3	3
Aspen	79	122.2	5.7	50.6627	2566.71			n	9	90		n	79	90
Cedar	9	101.7	11	33	1089			s2	2276.92	2276.92		s2	2276.92	2
	129				2276.92			v1	2	2		v1	2	2
								v2	24	267		v2	234	267
								phi	1.9	1.85		phi	1.79	1.85
								MDD	74.0255	22.7929		MDD	23.539	0.675524
								mean	113.633	113.633		mean	113.633	#DIV/0!
								MDD%	65.1442	20.0583		MDD%	20.7149	#DIV/0!

## Sheet: Kunert et al 2010 (MDD)
Species	n	SF (g/cm2/hr)	S.D.	Variance			MDD	Estimated n
cedrela odorata	4	20	4	16		k	9	9
anacardium excelsum	4	46	9	81		n	4	35
hura crepitans	4	33	8	64		s2	39.3333	39.3333
luehea seemannii	4	43	7	49		v1	8	8
tabebuia rosea	4	30	5	25		v2	27	306
gmelina arborea	4	20	5	25		phi	1.5	1.43
tectona grandis	4	35	6	36		MDD	19.9562	6.43159
acacia mangium	4	29	7	49		mean	32.7778	32.7778
terminalia amaonia	4	39	3	9		MDD%	60.8833	19.6218
				39.3333

[truncated: 4 more sheets: Samuelson et al 2008 (MDD), Hubbard et al. 2004 (MDD), Nagler et al. 2003 (MDD), MELNHE (MDD)]
